# Supplementary material for: Soil organic matter dynamics in semiarid agroecosystems transitioning to dryland
Source: PeerJ. 2020 Oct 20;8:e10199. doi: 10.7717/peerj.10199 (PMC7583628; doi:10.7717/peerj.10199)
Supplement: Supplemental Information 1 [file peerj-08-10199-s001.csv]

Table S1. Soil organic carbon (a) and total N (b) in 0–15 cm and 15–30 cm soil depths under various cropping systems and native grassland (Fig. 1 and Fig. 2 in text).
Treatment	Rep	Depth	SOC (Mg/ha	TN Mg/ha	SMBC (kg/ha)	Inorganic N (kg/ha)
DLCTF	1	0-15 cm	10.7	1.15	152	42
DLCTF	2	0-15 cm	11.9	1.22	244	34.7
DLCTF	3	0-15 cm	11.7	1.21	196	51.1
DLNTF	1	0-15 cm	12.6	1.28	258	59.5
DLNTF	2	0-15 cm	12.3	1.23	179	50.8
DLNTF	3	0-15 cm	10.3	1.14	167	43.4
LINTC	1	0-15 cm	14.2	1.57	382	89.9
LINTC	2	0-15 cm	14.6	1.48	458	105
LINTC	3	0-15 cm	19.1	1.99	391	69.1
LINTF	1	0-15 cm	14.9	1.52	391	65.3
LINTF	2	0-15 cm	13	1.38	375	41.4
LINTF	3	0-15 cm	14	1.44	374	86.6
NG	1	0-15 cm	20.1	2.04	747	4.2
NG	2	0-15 cm	26.6	2.79	784	5.3
NG	3	0-15 cm	24.6	2.64	695	5.7
DLCTF	1	15-30 cm	12.1	1.36	122	58
DLCTF	2	15-30 cm	11.3	1.34	154	82.9
DLCTF	3	15-30 cm	11	1.38	140	58.3
DLNTF	1	15-30 cm	11	1.26	179	56.1
DLNTF	2	15-30 cm	11.5	1.29	157	24.6
DLNTF	3	15-30 cm	11.8	1.41	172	53.5
LINTC	1	15-30 cm	11.3	1.24	173	36
LINTC	2	15-30 cm	12.1	1.42	182	59.4
LINTC	3	15-30 cm	11.6	1.36	207	31.8
LINTF	1	15-30 cm	10.6	1.38	188	37.3
LINTF	2	15-30 cm	12.4	1.42	222	28.8
LINTF	3	15-30 cm	12.6	1.45	287	43.3
NG	1	15-30 cm	17.5	1.73	438	3.3
NG	2	15-30 cm	14.9	1.5	455	2.7
NG	3	15-30 cm	17.4	1.71	514	3.2
DLCTF = dryland winter wheat–sorghum–fallow with conventional tillage, DLNTF = dryland winter wheat–sorghum–fallow with no-tillage, LINTC = limited-irrigation winter wheat–sorghum–fallow with no-tillage and cover crops, LINTF = limited-irrigation winter wheat–sorghum–fallow with no-tillage, and NG = native grassland.
Table S2. Observed and simulated CO2-C values at different days of incubation with and without normalizing to SOC content in each treatment (average of three replications) (Fig. 3 in text).
Observed CO2-C release
Days of	Treatment
incubation	DLCTF	DLNTF	LINTC	LINTF	NG	DLCTF	DLNTF	LINTC	LINTF	NG
	Absolute values					Normalized to SOC
1	1.12	1.58	1.9	2.15	4.41	0.17	0.23	0.22	0.24	0.34
2	2.22	2.73	3.25	3.9	7.56	0.35	0.4	0.38	0.44	0.58
3	2.83	3.46	4.04	4.54	8.64	0.44	0.51	0.47	0.52	0.66
4	3.47	4.06	4.82	5.23	9.88	0.54	0.59	0.57	0.59	0.76
8	4.8	5.22	7.42	7.31	14.5	0.75	0.76	0.87	0.83	1.11
12	5.83	7.1	8.92	8.65	16	0.91	1.04	1.05	0.98	1.23
14	6.85	7.85	10.1	9.6	18.5	1.07	1.15	1.18	1.09	1.42
20	7.82	8.89	10.9	11	22.9	1.22	1.3	1.28	1.25	1.76
26	9.13	10.2	13.5	13	24.7	1.42	1.49	1.59	1.48	1.89
35	10.3	12.2	15.6	14.7	28.8	1.61	1.78	1.83	1.67	2.21
41	11.3	13.7	17.2	15.7	30.1	1.75	2	2.02	1.78	2.31
45	12	15.2	18.1	16.6	32.2	1.87	2.22	2.13	1.88	2.47
52	13	16.3	19.3	17.7	33.9	2.02	2.38	2.27	2.01	2.6
60	14.5	17.7	20.8	19.3	36.7	2.25	2.59	2.44	2.19	2.81
Simulated CO2-C release
X†	1.41	1.75	2.13	2.51	5.01	0.22	0.26	0.25	0.28	0.38
k†	0.57	0.55	0.56	0.5	0.49	0.57	0.56	0.56	0.5	0.49
1	1.41	1.75	2.13	2.51	5.01	0.22	0.26	0.25	0.28	0.38
2	2.09	2.56	3.14	3.55	7.04	0.33	0.38	0.37	0.4	0.53
3	2.64	3.2	3.94	4.35	8.58	0.41	0.48	0.46	0.48	0.65
4	3.11	3.75	4.63	5.02	9.88	0.48	0.57	0.54	0.56	0.75
8	4.61	5.49	6.83	7.1	13.9	0.72	0.83	0.8	0.79	1.05
12	5.81	6.86	8.56	8.69	16.9	0.91	1.05	1.01	0.97	1.28
14	6.35	7.47	9.34	9.39	18.3	0.99	1.14	1.1	1.05	1.38
20	7.78	9.09	11.4	11.2	21.7	1.21	1.39	1.34	1.25	1.65
26	9.03	10.5	13.2	12.8	24.7	1.41	1.61	1.55	1.43	1.88
35	10.7	12.4	15.6	14.9	28.6	1.67	1.9	1.83	1.66	2.17
41	11.71	13.5	17	16.1	30.9	1.83	2.08	2	1.79	2.34
45	12.35	14.2	18	16.8	32.4	1.93	2.19	2.11	1.88	2.45
52	13.41	15.4	19.5	18.1	34.7	2.09	2.38	2.29	2.02	2.63
60	14.55	16.6	21.1	19.4	37.3	2.27	2.57	2.48	2.17	2.83
†X and k are model parameters for model in which Ym is modeled CO2-C release, X is a labile C in the soil (mg kg?1 soil), t is the decomposition time (days), and k is the decomposition rate constant (per day)
Table S3. Data used for regression analysis in Figure 4 in the manuscript file.
Treatment	Rep	Depth (cm)	SOC (Mg/ha	SMBC (kg/ha)	cumulative N2O-N (mg/kg)	cumulative CO2-C (g/kg)
DLCTF	1	0-15	10.71	152	9.3	13.48
DLCTF	2	0-15	11.87	244	9.32	15.31
DLCTF	3	0-15	11.74	196	11.45	14.61
DLNTF	1	0-15	12.58	258	9.33	18.05
DLNTF	2	0-15	12.28	179	9.15	18.21
DLNTF	3	0-15	10.29	167	9.06	16.77
LINTC	1	0-15	14.21	382	9.28	14.09
LINTC	2	0-15	14.63	458	16.81	30.6
LINTC	3	0-15	19.14	391	11.31	17.65
LINTF	1	0-15	14.91	391	9.93	21.02
LINTF	2	0-15	12.98	375	22.84	22.02
LINTF	3	0-15	13.95	374	10.73	14.71
NG	1	0-15	20.11	747	10.74	35.22
NG	2	0-15	26.64	784	10.34	34.3
NG	3	0-15	24.62	695	10.79	40.43
DLCTF	1	15-30	12.07	122
DLCTF	2	15-30	11.3	154
DLCTF	3	15-30	11.03	140
DLNTF	1	15-30	11.01	179
DLNTF	2	15-30	11.55	157
DLNTF	3	15-30	11.79	172
LINTC	1	15-30	11.25	173
LINTC	2	15-30	12.15	182
LINTC	3	15-30	11.65	207
LINTF	1	15-30	10.63	188
LINTF	2	15-30	12.4	222
LINTF	3	15-30	12.58	287
NG	1	15-30	17.45	438
NG	2	15-30	14.93	455
NG	3	15-30	17.42	514
DLCTF = dryland winter wheat–sorghum–fallow with conventional tillage, DLNTF = dryland winter wheat–sorghum–fallow with no-tillage, LINTC = limited-irrigation winter wheat–sorghum–fallow with no-tillage and cover crops, LINTF = limited-irrigation winter wheat–sorghum–fallow with no-tillage, and NG = native grassland.
Table S4. Observed and simulated N2O-N values at different days of incubation with and without normalizing to total N content in each treatment (average of three replications) (Fig. 5 in text).
Observed N2O-N release
Treatment
Days of	DLCTF	DLNTF	LINTC	LINTF	NG	DLCTF	DLNTF	LINTC	LINTF	NG
incubation	Absolute values					Normalized to TN
1	0.84	0.62	0.93	1.67	1.03	1.25	0.87	1.04	2.86	0.76
2	1.65	1.23	2.52	3.53	1.82	2.46	1.73	2.82	6.05	1.34
3	2.23	1.85	3.62	4.2	2.52	3.34	2.6	4.05	7.22	1.85
4	2.83	2.52	4.71	4.81	3.28	4.23	3.55	5.27	8.25	2.41
8	4.03	3.3	5.91	6.19	4.1	6.02	4.63	6.61	10.6	3
12	4.66	4.02	6.83	7.01	4.74	6.97	5.65	7.64	12	3.48
14	5.43	4.71	7.5	8.52	5.6	8.11	6.61	8.39	14.6	4.11
20	6.09	5.37	8.22	9.13	6.75	9.1	7.55	9.2	15.7	4.95
26	6.79	6.08	9.18	10.7	7.44	10.1	8.55	10.3	18.4	5.46
35	7.55	6.84	9.94	11.7	8.1	11.3	9.61	11.1	20	5.94
41	8.13	7.36	10.6	12.3	8.64	12.1	10.3	11.8	21.2	6.34
45	8.71	8.04	11.2	13.1	9.2	13	11.3	12.5	22.4	6.75
52	9.36	8.63	11.8	13.7	9.93	14	12.1	13.2	23.5	7.28
60	10	9.18	12.5	14.5	10.6	15	12.9	14	24.9	7.79
Simulated N2O-N release
X†	1.12	0.85	1.65	2.24	1.3	1.67	1.19	1.85	3.85	0.95
k†	0.55	0.6	0.52	0.47	0.53	0.55	0.6	0.52	0.47	0.53
1	1.12	0.85	1.65	2.24	1.3	1.67	1.19	1.85	3.85	0.95
2	1.64	1.29	2.37	3.1	1.88	2.45	1.8	2.65	5.33	1.37
3	2.05	1.64	2.92	3.75	2.33	3.06	2.3	3.28	6.45	1.7
4	2.4	1.95	3.39	4.3	2.71	3.58	2.73	3.8	7.39	1.98
8	3.51	2.96	4.87	5.95	3.91	5.24	4.14	5.45	10.2	2.86
12	4.39	3.78	6.01	7.2	4.85	6.55	5.29	6.74	12.4	3.55
14	4.78	4.14	6.51	7.74	5.26	7.13	5.8	7.3	13.3	3.85
20	5.82	5.13	7.83	9.16	6.36	8.68	7.18	8.78	15.7	4.65
26	6.72	6	8.98	10.4	7.31	10	8.4	10.1	17.8	5.34
35	7.92	7.18	10.5	11.9	8.56	11.8	10	11.8	20.5	6.25
41	8.63	7.89	11.4	12.8	9.31	12.9	11	12.8	22.1	6.8
45	9.09	8.34	11.9	13.4	9.78	13.6	11.7	13.4	23	7.14
52	9.84	9.1	12.9	14.3	10.6	14.7	12.7	14.4	24.7	7.71
60	10.6	9.92	13.9	15.3	11.4	15.9	13.9	15.6	26.4	8.32
†X and k are model parameters for
model in which Ym is modeled N2O-N release, X is a labile nitrogen in the soil (mg kg?1 soil), t is the decomposition time (days), and k is the decomposition rate constant (day?1).
